# Supplementary material for: Towards the Immunoproteome of Neisseria meningitidis
Source: PLoS One. 2009 Jun 16;4(6):e5940. doi: 10.1371/journal.pone.0005940 (PMC2691954; doi:10.1371/journal.pone.0005940)
Supplement: Table S2 — MS exclusion list (0.03 MB XLS) [file pone.0005940.s002.xls]

## Sheet: Sheet1
Table S2 - Peak exclusion list
Source	Mass
Matrix	855.1
Matrix	1060.1
Keratin	1066.44
Keratin	1179.59
Keratin	1232.62
Keratin	1277.7
Keratin	1475.78
Keratin	1993.97
Keratin	2383.93
Keratin	1179.6
Keratin	1300.53
Keratin	1716.85
Keratin	19939767
Keratin	1165.59
Keratin	2825.41
Trypsin	842.504
Trypsin	906.504
Trypsin	952.389
Trypsin	1006.49
Trypsin	1045.56
Trypsin	1469.73
Trypsin	1713.81
Trypsin	1736.84
Trypsin	1768.8
Trypsin	1774.9
Trypsin	2083.01
Trypsin	2158.03
Trypsin	2211.1
Trypsin	2283.18
Trypsin	3013.32
Trypsin	2408.15
